1  
2 **An autoregulatory switch in sex-specific *phf7* transcription causes loss of sexual identity**  
3 **and tumors in the *Drosophila* female germline**

4  
5 Anne E. Smolko<sup>1</sup>, Laura Shapiro-Kulnane and Helen K. Salz<sup>2</sup>

6 Department of Genetics and Genome Sciences,

7 Case Western Reserve University, School of Medicine

8 Cleveland, Ohio 44106-4955

9  
10 <sup>1</sup>Current Address: Division of Genetics, Brigham and Women's Hospital; Department of  
11 Genetics, Harvard Medical School, Boston, MA 02115

12  
13 <sup>2</sup>Correspondence and requests for material should be addressed to HKS ([hks@case.edu](mailto:hks@case.edu))

14  
15 **KEY WORDS:** germ cell fate, oogenesis, germline tumors, sex determination

16

17

18 **ABSTRACT**

19 Maintenance of germ cell sexual identity is essential for reproduction. Entry into the  
20 spermatogenesis or oogenesis pathway requires that the appropriate gene network is activated  
21 and the antagonist network is silenced. For example, in *Drosophila* female germ cells, forced  
22 expression of the testis-specific PHD finger protein 7 (PHF7) disrupts oogenesis leading to  
23 either an agametic or germ cell tumor phenotype. Here we show that PHF7 expressing ovarian  
24 germ cells inappropriately express hundreds of genes, many of which are male germline genes.  
25 We find that the majority of genes under PHF7 control in female germ cells are not under PHF7  
26 control in male germ cells, suggesting that PHF7 is acting in a tissue-specific manner.  
27 Remarkably, transcriptional reprogramming includes a positive autoregulatory feedback  
28 mechanism in which ectopic PHF7 overcomes its own transcriptional repression through  
29 promoter switching. Furthermore, we find that tumorigenic capacity is dependent on the dosage  
30 of *phf7*. This study reveals that high levels of ectopic PHF7 in female germ cells leads to a loss  
31 of sexual identity and promotion of a regulatory circuit beneficial for tumor initiation and  
32 progression.

33

## 34 INTRODUCTION

35 Germ cell development culminates in the production of sexually dimorphic haploid  
36 gametes: sperm and eggs. In most animals, cells destined to become germ cells are set aside  
37 during embryogenesis and migrate to the developing gonad. There they exhibit sex specific  
38 division rates and gene expression programs, ultimately leading to meiosis and differentiation  
39 into morphologically and functionally distinct gametes (Lesch and Page, 2012). Germ cell  
40 development is not possible when the sexual identity of the germ cells and the surrounding  
41 somatic gonadal cells do not match (Salz et al., 2017). Successful reproduction, therefore,  
42 requires that the appropriate sex-specific expression network be activated and the antagonist  
43 network be silenced.

44  
45 In *Drosophila melanogaster* germ cells, the female/male decision is initially guided by the  
46 sex of the developing somatic gonad (Casper and van Doren, 2009; Hashiyama et al., 2011;  
47 Horabin et al., 1995; Staab et al., 1996; Wawersik et al., 2005). Extrinsic control is eventually  
48 lost, and sexual identity is maintained by cell-intrinsic mechanisms (Casper and van Doren,  
49 2009). In female germ cells, maintenance of the embryonic sex fate decision requires the  
50 female-specific RNA binding protein Sex-lethal (SXL) (Chau et al., 2009; Schüpbach, 1985;  
51 Shapiro-Kulnane et al., 2015; Smolko et al., 2018). When germ cells lack SXL protein,  
52 differentiation is blocked and germ cell tumors are formed. Although loss of SXL leads to the  
53 ectopic sex-inappropriate transcription of hundreds of genes, dysregulation of one  
54 spermatogenesis gene, *PHD Finger Protein 7 (phf7)*, was found to be a major driver of the germ  
55 cell tumor phenotype (Shapiro-Kulnane et al., 2015).

56  
57 PHF7 is a predicted chromatin reader that was first identified in a screen for genes  
58 expressed in male but not female embryonic germ cells (Yang et al., 2012). In the adult testes,  
59 protein expression is restricted to the nuclei of the undifferentiated germline stem cells and early

60 spermatogonia (Yang et al., 2012; Yang et al., 2017). However, loss of *phf7* has only minimal  
61 impact on spermatogenesis. Mutant males harbor fewer differentiating spermatogonial cysts,  
62 resulting in fewer progeny than wild-type. Reduced fecundity appears to be caused by a failure  
63 to control expression of a small set of male germ cell genes (Yang et al., 2017).

64

65         Although not essential for germ cell development in males, it is crucial to prevent PHF7  
66 expression in female germ cells. PHF7-expressing ovarian germ cells fail to differentiate,  
67 resulting in an agametic or germ cell tumor phenotype (Shapiro-Kulnane et al., 2015; Yang et  
68 al., 2012). Interestingly, when PHF7-expressing XX germ cells develop in a sexually  
69 transformed somatic environment, they can produce sperm, albeit at a low frequency (Yang et  
70 al., 2012). These studies suggest that ectopic PHF7 expression is able to drive the germ cell  
71 towards a male developmental program. However, the impact of ectopic PHF7 on the  
72 transcriptional landscape is not known.

73

74         In this work, we combined genetic and genomic approaches to understand the  
75 consequences of ectopic PHF7 expression in ovarian germ cells. As expected, we find that a  
76 female to male identity switch underlies tumor formation. However, the majority of genes under  
77 PHF7 control in ovarian germ cells are not under PHF7 control in male germ cells. This  
78 suggests that PHF7 affects gene expression in a tissue-specific manner. Ectopic transcriptional  
79 reprogramming activity includes a positive autoregulatory feedback mechanism in which PHF7  
80 can overcome transcriptional repression of other *phf7* copies in the genome. The resulting  
81 increase in PHF7 expression correlates with an increase in tumorigenic capacity. Lastly, we  
82 show that transcriptional autoregulation and oncogenic properties of PHF7 requires the PHD  
83 fingers. Together, our work supports a model in which PHF7 reprograms transcription in the  
84 female germline by redirecting chromatin remodeling complexes to inappropriately activate male

85 germ cell genes; underscoring the importance of preventing expression of lineage-inappropriate  
86 genes for maintaining tissue homeostasis.

87

## 88 **RESULTS AND DISCUSSION**

### 89 **Deletion of the PHD fingers creates an inactive *phf7* allele**

90 *phf7* encodes a 520 amino acid protein with three adjacent N-terminal PHD fingers: a  
91 canonical PHD zinc finger domain (ZNF\_PHD), an extended PHD (ePHD) domain, and a RING-  
92 finger domain (ZNF\_RING) (Mitchell et al., 2019). PHD finger proteins are often involved in  
93 chromatin and transcriptional regulation. To test whether deleting this region impacts function *in*  
94 *vivo*, we used the tissue-specific GAL4/UAS induction system to force expression of *phf7* cDNA  
95 carrying an in-frame deletion of amino acids 68-111 (UASz::*phf7*<sup>ΔPHD</sup>). This transgene and a  
96 control wild-type transgene (UASz::*phf7*) were inserted into the genome via site-specific  
97 recombination in to the same location to allow direct comparisons (Fig. 1A).

98

99 Using the germ cell specific driver, *nos-Gal4::VP16*, we found that expression delivered  
100 from the wild-type UASz-*phf7* transgene caused females to be sterile. Progression of egg  
101 chamber formation was analyzed by staining for DNA and Vasa, a germ cell specific marker  
102 (Fig. 1B). The fly ovary is composed of 16-20 ovarioles, each of which is organized as an  
103 assembly line that generates egg chambers (Hinnant et al., 2020). At the anterior end of the  
104 ovariole, a structure called the germarium houses two to three germline stem cells. Each stem  
105 cell divides to create one daughter cell that remains a stem cell and a second daughter cell that  
106 enters the differentiation pathway. Differentiation begins with 4 incomplete mitotic divisions to  
107 generate a 16-cell cyst that develops into an egg chamber containing 1 oocyte and 15  
108 supporting nurse cells. As expected, the ovaries of *nos*> UASz-*phf7* mutant females exhibited  
109 morphological defects. 74% (n=167) of *nos*> UASz-*phf7* mutant ovarioles were agametic. In the  
110 remaining 26% of the mutant ovarioles we observed a tumor phenotype (Fig. 1B, C) defined by

111 the accumulation of excess germ cells in the germarium and the failure to form egg chambers  
112 with an oocyte and nurse cells.

113

114 In sharp contrast, the *nos> UASz-phf7<sup>ΔPHD</sup>* females were fertile and their ovaries were  
115 similar to wild-type (Fig. 1B, C). The failure to generate a mutant phenotype in this ectopic  
116 expression assay indicates that deleting the PHD finger domain inactivates *phf7*. Overall, these  
117 data show that ectopic expression in female germ cells is sufficient to disrupt oogenesis and  
118 suggests that the PHD finger domain is required. However, we cannot rule out other  
119 explanations for the loss of ectopic *phf7<sup>ΔPHD</sup>* activity, such as protein instability, because  
120 antibodies against PHF7 are unavailable.

121

## 122 **Ectopic Phf7 functions in a feedback loop**

123 Autoregulatory feedback mechanisms are often used to maintain expression of fate  
124 determining genes (Crews and Pearson, 2009). Therefore, we asked whether forced Phf7  
125 expression from the transgene could induce testis-like expression at the endogenous locus.

126

127 To monitor expression at the endogenous locus we used CRISPR to replace the open  
128 reading frame with GFP (*phf7<sup>ΔORF</sup>::GFP*; Fig. 2A). We determined that the reporter does not  
129 interfere with female fertility and that it recapitulates PHF7's sex-specific RNA and protein  
130 expression patterns (Fig. S1). When ectopic *phf7* expression (*nos> UASz-phf7*) is induced in  
131 this background, GFP protein is detected in tumors (Fig. 2B). We conclude that ectopic PHF7  
132 stimulates testis-like protein expression from an edited allele at the endogenous locus. In  
133 contrast, we did not observe GFP staining when ectopic expression of the inactive *phf7<sup>ΔPHD</sup>*  
134 allele was induced in this background (*phf7<sup>ΔORF</sup>::GFP; nos> UASz-phf7<sup>ΔPHD</sup>*; Fig. 2B),  
135 demonstrating that functional PHF7 protein is required for transactivation.

136

137           Next, we sought to demonstrate positive autoregulation using a different genetic  
138 paradigm. We forced PHF7 expression from the endogenous locus via an UASp-containing EP  
139 transposable element insertion,  $P\{EPgy2\}phf7^{EY03023}$  ( $phf7^{EY}$ ) located within the first intron (Fig.  
140 2A). Driving expression of  $phf7^{EY}$  with the germline *nos-GAL4* driver has been shown to drive  
141 tumor formation, albeit at a low frequency (Shapiro-Kulnane et al., 2015; Yang et al., 2012). We  
142 assessed transactivation with a HA-tagged *phf7* locus embedded in a 20 kb BAC rescue  
143 construct located on the 3<sup>rd</sup> chromosome (Fig. 2A). This transgene has been shown to serve as  
144 a faithful reporter of PHF7's sex-specific protein expression pattern (Shapiro-Kulnane et al.,  
145 2015; Yang et al., 2012). When these two genetic elements are combined (*nos>phf7<sup>EY</sup>; HA-*  
146 *phf7*), ectopic HA-PHF7 protein is detected in tumors (Fig. 2C). We conclude that ectopic PHF7  
147 stimulates testis-like protein expression from the transgenic tagged copy of *phf7*. This shows  
148 that ectopic PHF7 can stimulate testis-like expression from any *phf7* allele.

149

150           Together this data shows that once expressed in ovarian germ cells, PHF7 can increase  
151 its own expression via a positive autoregulatory feedback loop. This finding suggests that there  
152 may be a correlation between copy number and phenotype. In this context it is interesting to  
153 note that in the absence of functional *phf7* copies at the endogenous locus ( $phf7^{\Delta ORF}::GFP$ ;  
154 *nos>UASz-phf7*), the frequency of tumor formation upon induction with a third chromosome  
155 transgene was only 6%, and the majority of the mutant ovarioles were agametic (Fig. 1C). Two  
156 functional copies at the endogenous locus, using the same third chromosome transgene to  
157 ectopically express *phf7*, shifted the distribution of the mutant phenotypes towards a germ cell  
158 tumor phenotype (26% tumors in *nos>UASz-phf7*). Finally, using a different genetic paradigm  
159 with three full length copies of *phf7* dramatically increased the penetrance of the tumor  
160 phenotype to 70% (*nos>phf7<sup>EY</sup>; HA-phf7*). We therefore conclude that the level of PHF7 protein

161 dictates the phenotypic outcome, with the highest levels required for tumor initiation and  
162 progression.

163

#### 164 **Ectopic PHF7 transactivates via promoter-switching**

165 Although PHF7 protein is normally limited to male germ cells, *phf7* mRNAs are  
166 expressed in both male and female germ cells (Fig. 3A). Sex-specific regulation is achieved by  
167 a mechanism that relies primarily on alternative promoter choice and transcription start site  
168 (TSS) selection. In ovaries, transcription from the downstream TSS produces an mRNA, *phf7-*  
169 *RA*, but no protein is detectable. In testis, transcription from the upstream TSS produces a  
170 longer translatable mRNA, called *phf7-RC* (Shapiro-Kulnane et al., 2015). Our discovery that  
171 ectopic PHF7 can stimulate protein expression from any *phf7* allele suggests a mechanism that  
172 includes transcriptional switching to the male-specific TSS. With the identification of genetic  
173 conditions that increased the penetrance of the tumor phenotype to 70% (*nos>phf7<sup>EY</sup>; HA-phf7*),  
174 we were able to test this hypothesis by assaying for the presence of the testis-specific *phf7-RC*  
175 RNA isoform.

176

177 Using RT-PCR, we found that in control *phf7<sup>EY</sup>* ovaries, the EP insertion by itself does  
178 not interfere with *phf7*'s sexually dimorphic transcription pattern (Fig. 3B). Furthermore, we  
179 found that transcription from the transgenic HA-tagged *phf7* locus is also regulated appropriately  
180 as no HA-tagged *phf7-RC* (*HA-phf7-RC*) transcript is detected in ovaries (Fig. 3C, control). In  
181 *nos>phf7<sup>EY</sup>; HA-phf7* mutant ovaries, however, we found that *HA-phf7-RC* is ectopically  
182 expressed (Fig. 3C). This work demonstrates that ectopic PHF7 stimulates testis-like  
183 transcription from the transgenic, tagged copy of *phf7*.

184

185 In agreement with our RT-PCR analysis, alignment of RNA-sequencing (RNA-seq) data  
186 showed that the testis-specific *phf7-RC* transcript is ectopically expressed in *nos>phf7<sup>EY</sup>; HA-*



187 *phf7* mutant ovaries (Fig. 4A). These data also illustrate that novel RNAs are produced from the  
188 region near the EP transposon insertion site within the first intron. We therefore conclude that  
189 forced PHF7 expression initiates an autoregulatory feedback loop which overcomes  
190 transcriptional repression of the testis-specific promoter.

191

## 192 **Ectopic PHF7 provokes testis-specific gene expression programming**

193 To gain a genome-wide view of the expression changes downstream of ectopic PHF7  
194 expression we compared the transcriptomes of mutant ovaries with wild-type ovaries from  
195 newborn (0-24 h) females. This analysis identified 835 genes that were downregulated at least  
196 2-fold (FDR <0.05; Table S1), and 799 genes that were upregulated at least 2-fold (FDR <0.05;  
197 Table S2) in *nos>phf7<sup>EY</sup>; HA-phf7* mutant ovaries. 286 of the upregulated genes are not  
198 detectable in wild-type ovaries (FPKM <1; Fig. 4B). Hierarchical clustering of the ectopically  
199 expressed genes revealed a tissue-specific signature most similar to samples from adult testis  
200 (Fig. 4C). Indeed, 60% (173/286) of the ectopically expressed tumor genes are genes known to  
201 be highly expressed in normal testis. Interestingly, several of the aberrantly expressed testis  
202 genes encode components of the specialized transcription and translation machinery that  
203 operates in the male germline (White-Cooper and Caporilli, 2013). These include Taf12L, Dany,  
204 RpL37b, RpL22-like, eIF4E-3, and eIF4E-6 (Fig. 4D). The acquisition of these male germ cell  
205 features reveals that forcing PHF7 expression leads to a loss of sexual identity and adoption of  
206 a male fate.

207

208 Given that ectopic expression of PHF7 in ovarian germ cells can drive transcription of  
209 normally silenced male germ cell genes, we hypothesized that PHF7 controls expression of the  
210 same set of genes in male germ cells. In an analysis focused on *phf7* function in the male  
211 germline, only 45 genes were found to be differentially expressed in *phf7* loss of function testis  
212 (Yang et al., 2017). Only one of these genes (CG15599) is ectopically expressed in PHF7-

213 expressing ovarian germ cells. An additional 16 genes are significantly affected in both PHF7-  
214 expressing ovarian germ cells and *phf7* loss of function male germ cells (Table S3). Thus,  
215 contrary to our expectations, we found that the majority of genes under PHF7 control are  
216 different in male and female germ cells. These observations imply that tissue-specific factors  
217 define the genes and pathways under PHF7 control and raises the possibility that PHF7's role in  
218 female germ cells may be different from its role in male germ cells.

219

220 In summary, our studies highlight the importance of preventing expression of lineage-  
221 inappropriate genes for maintaining tissue homeostasis. We demonstrate that once expressed  
222 in female germ cells, PHF7 can increase its own expression via a positive autoregulatory  
223 feedback loop. Our data further suggest that high levels of ectopic PHF7 are prerequisite to  
224 activate a male germ cell transcriptional program that drives tumor initiation and progression in  
225 female germ cells. PHF7 is a presumed chromatin reader as it preferentially binds to H3K4me2  
226 *in vitro*, a mark generally enriched at transcription start sites (Yang et al., 2012). However, the  
227 mechanism by which PHF7 controls gene expression *in vivo* has remained elusive due to the  
228 lack of experimentally confirmed target genes. We speculate that, in female germ cells, PHF7  
229 redirects chromatin remodeling complexes to inappropriately activate male germ cells genes.  
230 Future studies will focus on identifying the genes directly controlled by PHF7 to reveal the  
231 mechanism by which PHF7 fuels the oncogenic gene expression program.

232

## 233 MATERIALS AND METHODS

### 234 *Drosophila* stocks and culture conditions

235 The wild-type reference strain was  $y^1, w^1$  (BDSC #1495). The following stocks were used  
236 to ectopically express *phf7* in female germ cells: P{GAL4::VP16-nos.UTR} (BDSC #4937),  
237 P{EPgy2}Phf7<sup>EY03023</sup> (BDSC #15894), P{UASz-Phf7} (this study) and P{UASz-Phf7<sup>ΔPHD</sup>} (this  
238 study). The following stocks were used to report on *phf7* gene activity: The HA-tagged *phf7*  
239 transgene, PBac{3XHA-PHF7}, generated in the Van Doren lab by tagging the *phf7* locus  
240 included in the 20 kb BAC construct CH322-177L19 and inserted it into the 65B2 PBac{y[+]-  
241 attP-3B}VK00033 site via *phi-C31* catalyzed integration (Yang et al., 2012), and the  
242 *phf7*<sup>ΔORF</sup>::GFP allele (this study).

243  
244 *Drosophila* stocks were maintained at 25°C. Crosses to drive ectopic expression with the  
245 UASz transgenes were set up at 29°C and the adults were aged 3-5 days prior to gonad  
246 dissection. Crosses to generate ectopic expression with P{EPgy2}Phf7<sup>EY03023</sup> were set up at  
247 18°C and the adults were transferred to 29°C for 10 days prior to gonad dissection.

### 248 249 Generation of transgenic lines

250 Constructs were generated in the UASz expression vector to maximize expression in the  
251 female germline (DeLuca and Spradling, 2018). The P{UASz-Phf7} transgene was constructed  
252 by cloning the *phf7*cDNA (LD43541) into the mini-white containing *pUASz1.1* transformation  
253 vector (DGRC #1433). To construct the P{UASz-Phf7<sup>ΔPHD</sup>} transgene, an NEB Q5 mutagenesis  
254 kit was used to generate a deletion in the coding region using the primers: F-5'-  
255 TGCCATCAGCATGTGCTG-3' and R-5'-AAGCAAACGGCAGCGGTT-3'. The transgenic  
256 constructs were sent for *phi-C31* catalyzed integration into the 65B2 PBac{y[+]-attP-  
257 3B}VK00033 site (Rainbow Transgenic Flies, Inc).

258

## 259 **Generation of the *phf7*<sup>ΔORF</sup>-GFP allele**

260 The *phf7*<sup>ΔORF</sup>::GFP allele was generated using CRISPR to replace the *phf7* open reading  
261 frame with GFP. To generate the *phf7*<sup>ΔORF</sup> deletion allele, the following guide RNAs were  
262 synthesized and ligated into the pU6-BbsI-chiRNA vector (Addgene #45946):

263

264 gRNA1: F-5'- CTTGGTCACCGGAAACGCATCCA-3' and

265 R-5'- AAAGTGGATGCGTTTCCGGTGACC-3'.

266 gRNA2: F-5'- CTTGAATCCTTGCGGCTGGCCATG-3' and

267 R-5'- AAACCATGGCCAGCCGCAAGGATTC-3'.

268

269 1 kb homology arms were generated through PCR and cloned into the pHD-dsRed-attP  
270 (Addgene #51019). Guide RNAs and the donor vector were co-injected into *vas*-Cas9 embryos  
271 (BDSC #51324; Rainbow Transgenic Flies, Inc). To insert GFP, the *gfp* coding sequence was  
272 cloned into the attB containing RIV-white<sup>+</sup> transformation vector (DGRC #1330) and sent for *phi*-  
273 C31 catalyzed integration into the attP site present in *phf7*<sup>ΔORF</sup> (Rainbow Transgenic Flies, Inc).

274

## 275 **Immunofluorescence and image analysis**

276 Ovaries and testis were fixed and stained according to standard procedures with the  
277 following primary antibodies: rat anti-HA (1:500, Roche cat# 11867423001, RRID: AB\_390919),  
278 rat anti-Vasa (1:100, Developmental Studies Hybridoma Bank, RRID: AB\_760351) and rabbit  
279 anti-GFP (1:2500, Thermo Fisher, cat# A-11122, RRID: AB\_221569). Staining was detected  
280 with the following conjugated antibodies: Fluorescein (FITC) anti- rat (1:200, Jackson  
281 ImmnoResearch Labs, cat#A-21434, RRID: AB\_2535855), FITC anti-rabbit (1:200, Jackson  
282 ImmnoResearch Labs, cat#111-095-003, RRID: AB\_2337972), Alexa Fluor 555 anti- rat (1:200,

283 Thermo Fisher, cat# A-21434, RRID: AB\_2535855) or Alexa Fluor 555 anti-rabbit (1:200,  
284 Thermo Fisher, cat# A-21428, RRID: AB\_2535849). TO-PRO-3 Iodide monomeric cyanine  
285 nucleic acid stain (Thermo Fisher, cat# T3605) was used to stain DNA.

286 Images were taken on a Leica SP8 confocal with 1024x1024 pixel dimensions, a scan  
287 speed of 600 Hz, and a frame average of 3. Sequential scanning was done for each channel  
288 and three Z-stacks were combined for each image. Processed images were compiled with Gnu  
289 Image Manipulation Program (GIMP) and Microsoft PowerPoint.

290

### 291 **qRT-PCR and data analysis**

292 RNA was extracted from dissected gonads using TRIzol (Thermo Fisher, cat#  
293 15596026) and DNase RQ1 (Promega, cat# M6101). Quantity and quality were measured using  
294 a NanoDrop spectrophotometer. cDNA was generated by reverse transcription using a  
295 SuperScript First-Strand Synthesis System for RT-PCR Kit (Thermo Fisher, cat# 11904018)  
296 using random hexamers. qPCR was performed using Power SYBR Green PCR Master Mix  
297 (Thermo Fisher, cat# 4367659) with an Applied Biosystems 7300 Real Time PCR system. PCR  
298 steps were as follows: 95°C for 10 minutes followed by 40 cycles of 95°C for 15 seconds and  
299 60°C for 1 minute. Melt curves were generated with the following parameters: 95°C for 15  
300 seconds, 60°C for 1 minutes, 95°C for 15 seconds, and 60°C for 15 seconds. Measurements  
301 were taken in biological triplicate with two technical replicates each. Relative transcript levels  
302 were calculated using the  $2^{-\Delta\Delta Ct}$  method (Livak and Schmittgen, 2001).

303

304 To measure RNA levels in *phf7<sup>ΔORF::GFP</sup>* gonads, the primer sequences were: for *phf7-*  
305 *RC*, F-5'-AGTTCGGGAATTCAACGCTT-3' and R-5'-GAGATAGCCCTGCAGCCA-3'; for *gfp*, F-  
306 5'- ACGTAAACGGCCACAAGTTC and R-5'-AAGTCGTGCTGCTTCATGTG-3'.

307

308 To measure RNA levels in wild-type and *phf<sup>EY</sup>* gonads, the primer sequences were for  
309 *phf7-RC*, *phf7-RC*, F-5'-AGTTCGGGAATTCAACGCTT-3' and R-5'-  
310 GAGATAGCCCTGCAGCCA-3'; for total *phf7* F-5'-GAGCTGATCTTCGGCACTGT-3' and R-5'-  
311 GCTTCGATGTCCTCCTTGAG-3'.

312

313 To measure RNA levels from the PBac{3XHA-PHF7} transgene, the primers were for  
314 *HA-phf7-RC*, F-5'-CTGCAGGGCTATCTCCGATA-3' and R-5'-TAGCCCGCATAGTCAGGAAC -  
315 3'; for total *HA-phf7*, F-5'- CGATGTTTCCTGACTATGCGG-3' and R-5'-  
316 ACAGTGCCGAAGATCAGCT-3'

317

### 318 **RNA-seq and data analysis**

319 Total RNA was extracted from dissected ovaries using TRIzol (Thermo Fisher, cat#  
320 15596026). RNA quality was assessed with Qubit and Agilent Bioanalyzer. Libraries were  
321 generated using the Illumina TruSeq Stranded Total RNA kit (cat# 20020599). Sequencing was  
322 completed on 2 biological replicates of each genotype with the Illumina HiSeq 2500 v2 with  
323 100bp paired end reads. Sequencing reads were aligned to the *Drosophila* genome (UCSC  
324 dm6) using TopHat (2.1.0) (Trapnell et al., 2009). Differential analysis was completed using  
325 CuffDiff (2.2.1) (Trapnell et al., 2012). Genes were considering differentially expressed if they  
326 exhibited a two-fold or higher change relative to wild-type with a False Discovery Rate (FDR)  
327 <0.05. The wild-type ovary mRNA-seq data sets are available from the National Center for  
328 Biotechnology Information's GEO database under accession number GSE109850.  
329 and the mutant ovary mRNA-seq data sets are available under accession number GSE150213.

330

331 The screen shot of the expression data is from Integrated Genome Viewer (IGV). To  
332 account for the differences in sequencing depth when creating IGV screenshots, the processed

333 RNAseq alignment files were scaled to the number of reads in the wild type file. This was done  
334 with Deeptools bigwigCompare using the scale Factors parameter with a bin size of 5.

335  
336 Scatter plots were generated using ggplot function in R. Genes that were expressed in  
337 mutant (FPKM  $\geq$  1) but not expressed in wild type ovaries (FPKM $<$ 1) were called ectopic.

338  
339 Tissue expression clustering of the ectopically expressed genes was performed to  
340 identify tissue-specific signatures. Expression values normalized to the whole fly were extracted  
341 from FlyAtlas (versions 1 and 2) (Leader et al., 2018; Robinson et al., 2013). The heatmap to  
342 compare the tissue expression profile of these genes per tissue was generated in R with  
343 heatmap.2 (gplots). Genes were clustered and normalized per row.

344

#### 345 **Acknowledgments**

346 We would like to thank Dr. Mark Van Doren, the Bloomington Drosophila Stock Center  
347 and the Iowa Developmental Studies Hybridoma Bank for fly stocks and antibodies. We would  
348 like to thank the Genomics Core at CWRU for performing the RNA-seq and Jane Heatwole for  
349 fly food. Imaging was performed using equipment purchased through NIH S10OD016164. This  
350 work was supported by the National Institutes of Health, R01GM129478 to H.K.S. and  
351 T32GM008056 to A.E.S.

352

#### 353 **Data Availability**

354 All raw and processed sequencing data generated during the course of this analysis can  
355 be found in GEO under accession number GSE150213.

356

357 **Figure Legends**

358

359 **Fig. 1. Deletion of the PHD domain disables ectopic PHF7 activity in female germ cells (A)**

360 Schematic representation of the fly lines used to express wild-type and mutant *phf7* cDNAs via  
 361 the GAL4/UAS system. The cDNAs were cloned into the UASz expression vector and inserted  
 362 into the third chromosome 65B2 attP site. (B) Ectopic expression of wild type (*nos>phf7*) but not  
 363 mutant (*nos>phf7<sup>ΔPHD</sup>*) PHF7 in germ cells disrupts oogenesis. Representative confocal  
 364 images of mutant and control ovarioles, including the germarium and egg chambers (EC),  
 365 stained for Vasa (green) and DNA (red). Scale bar, 50 μm. (C) Quantification of the different  
 366 mutant ovariole phenotypes observed in this study. The number of ovarioles scored is indicated.  
 367

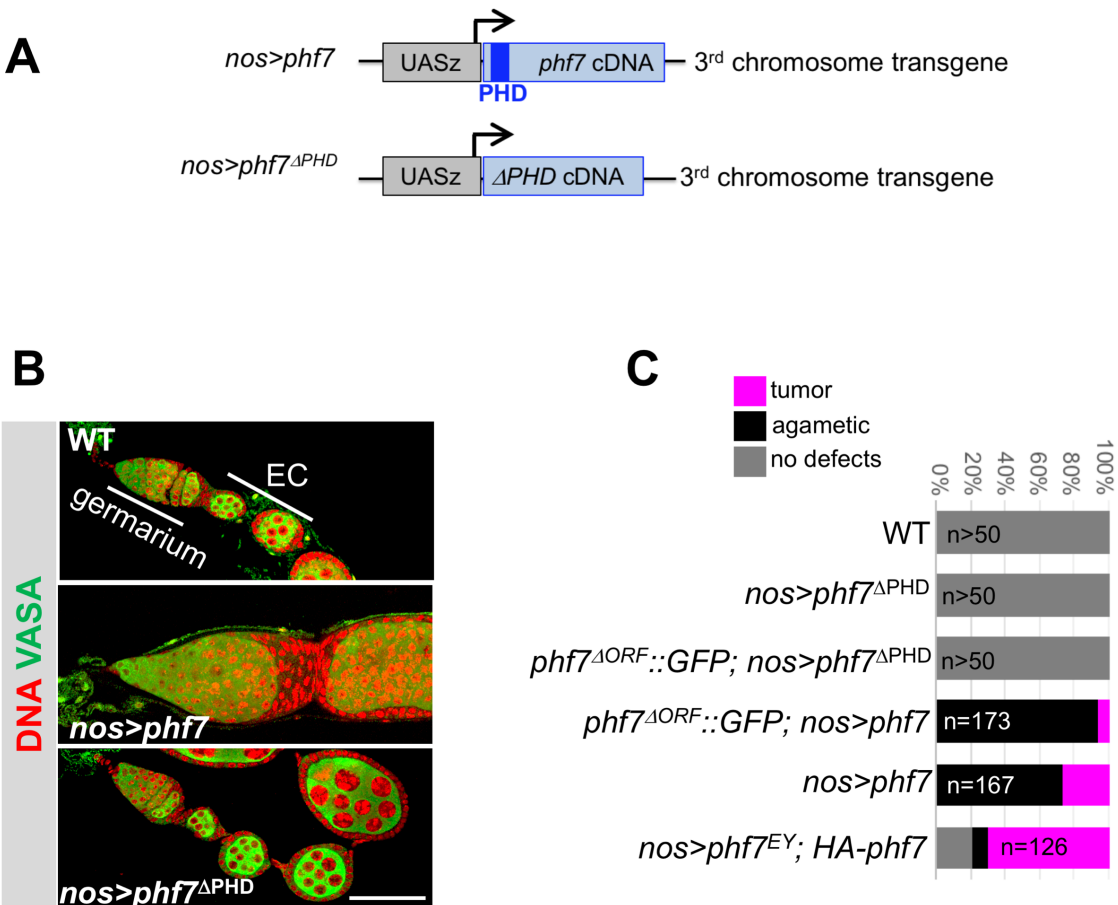

368

369



370 **Fig. 2. Ectopic PHF7 stimulates testis-like expression from reporter alleles**

371 (A) Schematic representations of Top: the knock-in *phf7*<sup>ΔORF</sup>::GFP allele used to report on *phf7*  
372 activity. Middle: the 3<sup>rd</sup> chromosome HA-tagged *phf7* reporter allele, located within a 20 kb BAC  
373 inserted into the 65B2 attP site. Bottom: the *phf7*<sup>EY</sup> allele in which the UASp containing  
374 P{EPgy2} element inserted into the first intron of the endogenous locus is used to ectopically  
375 express *phf7* via the GAL4/UAS system. (B) Ectopic PHF7 can induce testis-like expression  
376 from the knock-in *phf7*<sup>ΔORF</sup>::GFP allele. Confocal images of ovarioles from *phf7*<sup>ΔORF</sup>::GFP;  
377 *nos>phf7* and control *phf7*<sup>ΔORF</sup>::GFP;*nos>phf7*<sup>ΔPHD</sup> females stained for GFP protein (green) and  
378 DNA (red). Scale bar, 50 μm. (C) Ectopic PHF7 can induce testis-like expression from a 3<sup>rd</sup>  
379 chromosome HA-tagged reporter construct. Confocal images of ovarioles from mutant  
380 *nos>phf7*<sup>EY</sup>; *HA-phf7* and control *nos*; *HA-phf7* females stained for HA (green) and DNA (red).  
381 Scale bar, 50 μm.

382

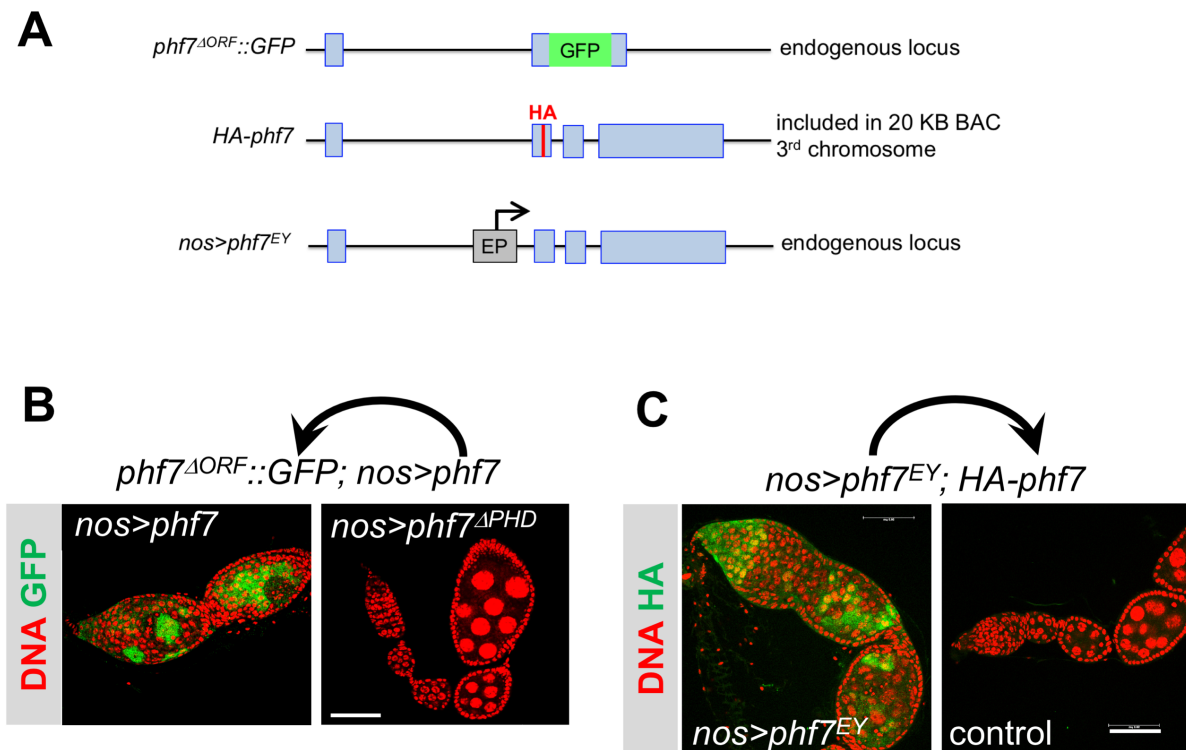

383

384

385 **Fig. 3. Ectopic PHF7 transactivates via promoter-switching** (A) IGV genome browser view  
386 of the two major *phf7* transcripts, the testis-specific *phf7-RC* (blue arrow) and *phf7-RA* (pink  
387 arrow). Exons are represented by blue blocks connected by horizontal lines representing  
388 introns. The insertion site of the UAS-containing insertion in *phf7<sup>EY</sup>* is represented by a triangle.  
389 Location of primers for RT-qPCR are indicated by arrowheads. (B) RT-qPCR measurements of  
390 *phf7-RC* transcript in ovaries and testis from wild-type and *phf7<sup>EY</sup>* mutant animals (grey primer  
391 pairs). Expression is normalized to the total level of *phf7* (red primer pairs). Error Bars indicate  
392 standard deviation of three biological replicates. (C) RT-qPCR measurements of transgenic *HA-*  
393 *phf7-RC* transcript in ovaries from mutant *nos>phf7<sup>EY</sup>; HA-*phf7** and control *nos; HA-*phf7**  
394 females. Primers to the HA tag, located at the beginning of the open reading frame were used to  
395 distinguish transgenic *phf7* RNA from the endogenous products: green primer pairs for *HA-*phf7-RC**  
396 *RC* and modified red primer pairs for total *HA-*phf7**. Error Bars indicate standard deviation of  
397 three biological replicates.

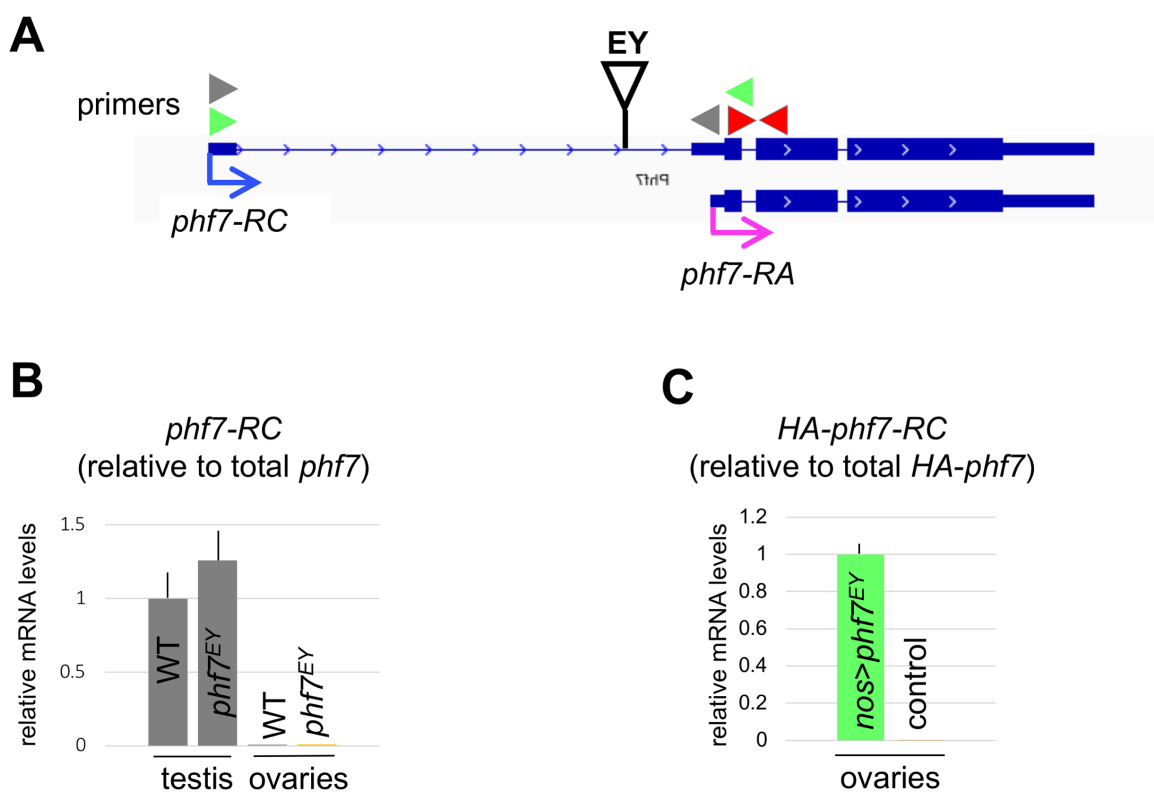

398

399

400

401 **Fig.4. Ectopic *phf7* leads to female-to-male reprogramming of many genes including**  
 402 **itself.** (A) IGV genome browser view of the *phf7* locus. Wild-type RNA-seq reads are in pink and  
 403 *nos>phf7<sup>EY</sup>; HA-*phf7** RNA-seq reads are in green. The screen shot is reversed so that the start  
 404 of transcription is on the left and all tracks are viewed at the same scale. Beneath is the RefSeq  
 405 gene annotation of the two *phf7* transcripts and the location of the EP-element insertion in the  
 406 endogenous locus of *phf7<sup>EY</sup>*. B) Scatter plots of significantly upregulated genes in *nos>phf7<sup>EY</sup>;*  
 407 *HA-*phf7** mutant ovaries. The log<sub>2</sub> fold change in gene expression is plotted against the log<sub>2</sub> of  
 408 the FPKM values in wild-type ovaries. Blue points indicate ectopically expressed genes, genes  
 409 which are not expressed in wild-type ovaries (log<sub>2</sub> < 0). (C) Tissue expression clustering of the  
 410 ectopically expressed genes in *nos>phf7<sup>EY</sup>; HA-*phf7** mutant ovaries, displayed as a Z-score  
 411 heatmap. Each column is an adult tissue. Each row is an ectopically expressed gene. (D)  
 412 Expression values of select testis-specific genes in wild-type ovaries and *nos>phf7<sup>EY</sup>; HA-*phf7**  
 413 mutant ovaries displayed as a heat map of log<sub>2</sub> FPKM values from RNA-seq analysis.

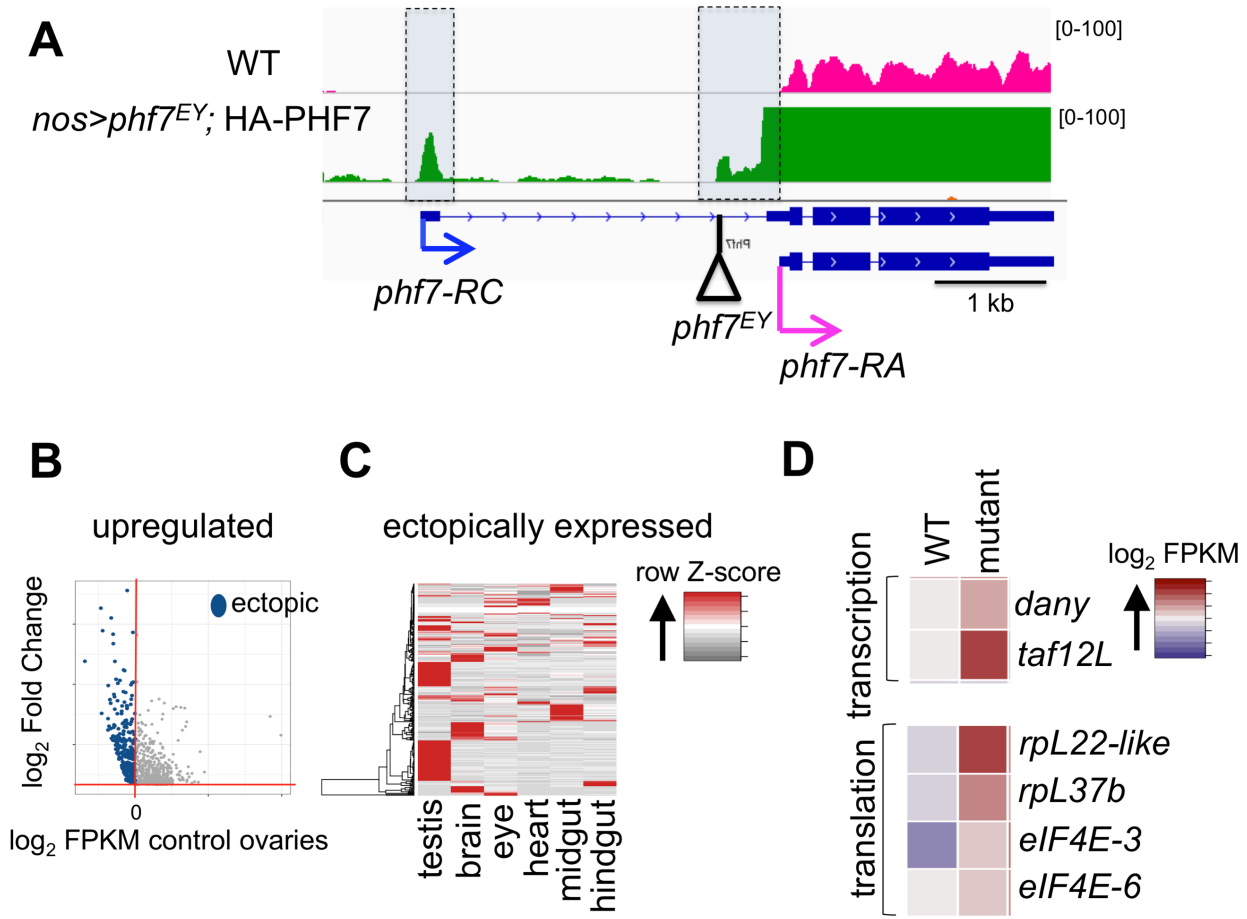

414

415 **Fig. S1 The *phf7<sup>ΔORF</sup>::GFP* allele is sex-specifically regulated.** (A) Schematic of the  
416 *phf7<sup>ΔORF</sup>::GFP* allele in which the open reading frame was replaced by GFP (green box).  
417 Primers for RT-qPCR are indicated by arrowheads: Gray for *phf7-RC*, and Green for GFP. (B)  
418 RT-qPCR measurements of *phf7-RC* transcript in *phf7<sup>ΔORF</sup>::GFP* ovaries and testis. Error Bars  
419 indicate standard deviation of three biological replicates. (C) Confocal images of testis from  
420 hemizygous *phf7<sup>ΔORF</sup>::GFP* males and ovaries from homozygous *phf7<sup>ΔORF</sup>::GFP* females stained  
421 for GFP protein (green) and DNA (red). Scale bar, 50 μm.  
422

**A** *phf7<sup>ΔORF</sup>::GFP*

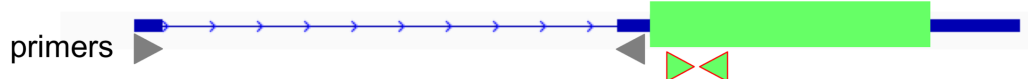

**B**

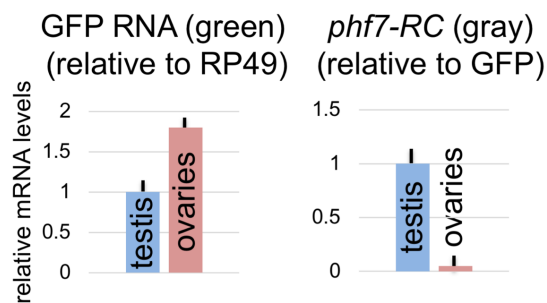

**C**

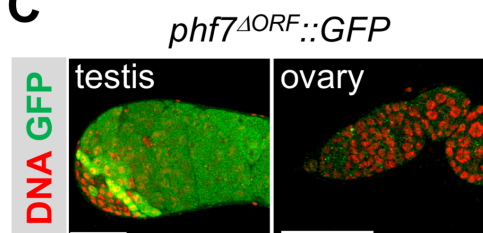

423

424

425

426 **References**

427

428 **Casper, A. L. and van Doren, M.** (2009). The establishment of sexual identity in the *Drosophila*  
429 germline. *Development* **136**, 3821–3830.

430 **Chau, J., Kulnane, L. S. and Salz, H. K.** (2009). Sex-lethal facilitates the transition from  
431 germline stem cell to committed daughter cell in the *Drosophila* ovary. *Genetics* **182**, 121–  
432 132.

433 **Crews, S. T. and Pearson, J. C.** (2009). Transcriptional autoregulation in development. *Curr*  
434 *Biol* **19**, R241–6.

435 **DeLuca, S. Z. and Spradling, A. C.** (2018). Efficient Expression of Genes in the *Drosophila*  
436 Germline Using a UAS Promoter Free of Interference by Hsp70 piRNAs. *Genetics* **209**,  
437 381–387.

438 **Hashiyama, K., Hayashi, Y. and Kobayashi, S.** (2011). *Drosophila* Sex lethal Gene Initiates  
439 Female Development in Germline Progenitors. *Science* **333**, 885–888.

440 **Hinnant, T. D., Merkle, J. A. and Ables, E. T.** (2020). Coordinating Proliferation, Polarity, and  
441 Cell Fate in the *Drosophila* Female Germline. *Front Cell Dev Biol* **8**, 19.

442 **Horabin, J. I., Bopp, D., Waterbury, J. and Schedl, P.** (1995). Selection and maintenance of  
443 sexual identity in the *Drosophila* germline. *Genetics* **141**, 1521–1535.

444 **Leader, D. P., Krause, S. A., Pandit, A., Davies, S. A. and Dow, J. A. T.** (2018). FlyAtlas 2: a  
445 new version of the *Drosophila melanogaster* expression atlas with RNA-Seq, miRNA-Seq  
446 and sex-specific data. *Nucleic Acids Res* **46**, D809–D815.

- 447 **Lesch, B. J. and Page, D. C.** (2012). Genetics of germ cell development. *Nature Reviews*  
448 *Genetics* **13**, 781–794.
- 449 **Livak, K. J. and Schmittgen, T. D.** (2001). Analysis of relative gene expression data using  
450 real-time quantitative PCR and the 2(-Delta Delta C(T)) Method. *Methods* **25**, 402–408.
- 451 **Mitchell, A. L., Attwood, T. K., Babbitt, P. C., Blum, M., Bork, P., Bridge, A., Brown, S. D.,**  
452 **Chang, H.-Y., El-Gebali, S., Fraser, M. I., et al.** (2019). InterPro in 2019: improving  
453 coverage, classification and access to protein sequence annotations. *Nucleic Acids Res* **47**,  
454 D351–D360.
- 455 **Robinson, S. W., Herzyk, P., Dow, J. A. T. and Leader, D. P.** (2013). FlyAtlas: database of  
456 gene expression in the tissues of *Drosophila melanogaster*. *Nucleic Acids Res* **41**, D744–  
457 50.
- 458 **Salz, H. K., Dawson, E. P. and Heaney, J. D.** (2017). Germ cell tumors: Insights from the  
459 *Drosophila* ovary and the mouse testis. *Mol. Reprod. Dev.* **84**, 200–211.
- 460 **Schüpbach, T.** (1985). Normal female germ cell differentiation requires the female X  
461 chromosome to autosome ratio and expression of sex-lethal in *Drosophila melanogaster*.  
462 *Genetics* **109**, 529–548.
- 463 **Shapiro-Kulnane, L., Smolko, A. E. and Salz, H. K.** (2015). Maintenance of *Drosophila*  
464 germline stem cell sexual identity in oogenesis and tumorigenesis. *Development* **142**,  
465 1073–1082.
- 466 **Smolko, A. E., Shapiro-Kulnane, L. and Salz, H. K.** (2018). The H3K9 methyltransferase  
467 SETDB1 maintains female identity in *Drosophila* germ cells. *Nat Commun* **9**, 4155.

- 468 **Staab, S., Heller, A. and Steinmann-Zwicky, M.** (1996). Somatic sex-determining signals act  
469 on XX germ cells in *Drosophila* embryos. *Development* **122**, 4065–4071.
- 470 **Trapnell, C., Pachter, L. and Salzberg, S. L.** (2009). TopHat: discovering splice junctions with  
471 RNA-Seq. *J Gerontol* **25**, 1105–1111.
- 472 **Trapnell, C., Roberts, A., Goff, L., Pertea, G., Kim, D., Kelley, D. R., Pimentel, H., Salzberg,**  
473 **S. L., Rinn, J. L. and Pachter, L.** (2012). Differential gene and transcript expression  
474 analysis of RNA-seq experiments with TopHat and Cufflinks. *Nat Protoc* **7**, 562–578.
- 475 **Wawersik, M., Milutinovich, A., Casper, A. L., Matunis, E., Williams, B. and van Doren, M.**  
476 (2005). Somatic control of germline sexual development is mediated by the JAK/STAT  
477 pathway. *Nature* **436**, 563–567.
- 478 **White-Cooper, H. and Caporilli, S.** (2013). Transcriptional and post-transcriptional regulation  
479 of *Drosophila* germline stem cells and their differentiating progeny. *Adv. Exp. Med. Biol.*  
480 **786**, 47–61.
- 481 **Yang, S. Y., Baxter, E. M. and van Doren, M.** (2012). Phf7 controls male sex determination in  
482 the *Drosophila* germline. *Dev Cell* **22**, 1041–1051.
- 483 **Yang, S. Y., Chang, Y.-C., Wan, Y. H., Whitworth, C., Baxter, E. M., Primus, S., Pi, H. and**  
484 **van Doren, M.** (2017). Control of a Novel Spermatocyte-Promoting Factor by the Male  
485 Germline Sex Determination Factor PHF7 of *Drosophila melanogaster*. *Genetics* **206**,  
486 1939–1949.
- 487
